# Supplementary material for: High-precision neural stimulation by a highly efficient candle soot fiber optoacoustic emitter
Source: PubMed Central journal article supplement (PMC9669258; doi:10.3389/fnins.2022.1005810), 2022-11-03
Supplement: Image_1.pdf [file Image_1.pdf]

## *Supplementary Material*

### 1. Supplementary Figures

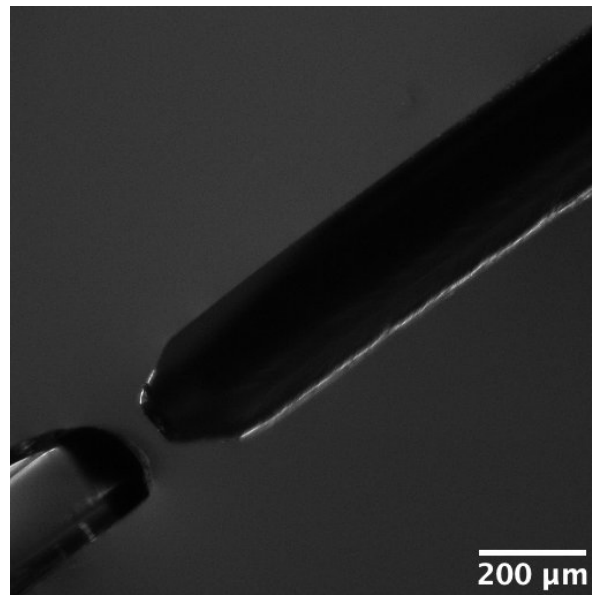

**Supplementary Figure 1.** Image of CSFOE (lower left) photoacoustic signal measurement using a needle hydrophone (upper right) by a microscope with 10X objective.

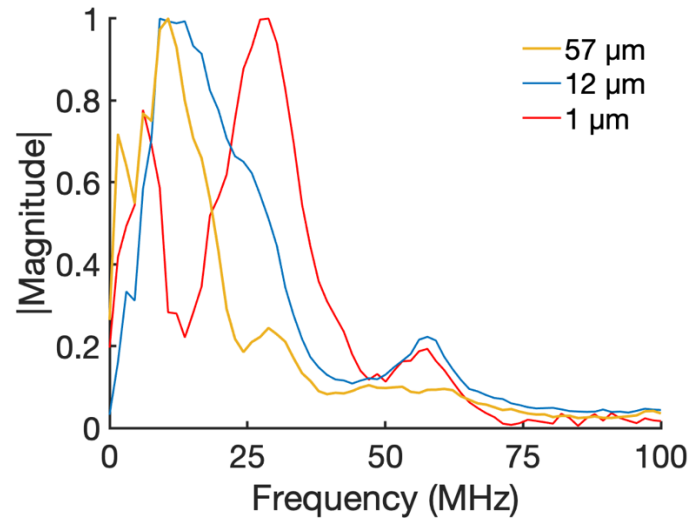

**Supplementary Figure 2.** Frequency analysis of optoacoustic signal generated by different CSFOEs with different candle soot layer thickness.
